# Supplementary material
Source: PubMed Central journal article supplement (PMC10923561)

## B. Supplementary Appendix

for online publication only

Figure B1: Household practice of untouchability does not interact with PSU average to predict household open defecation

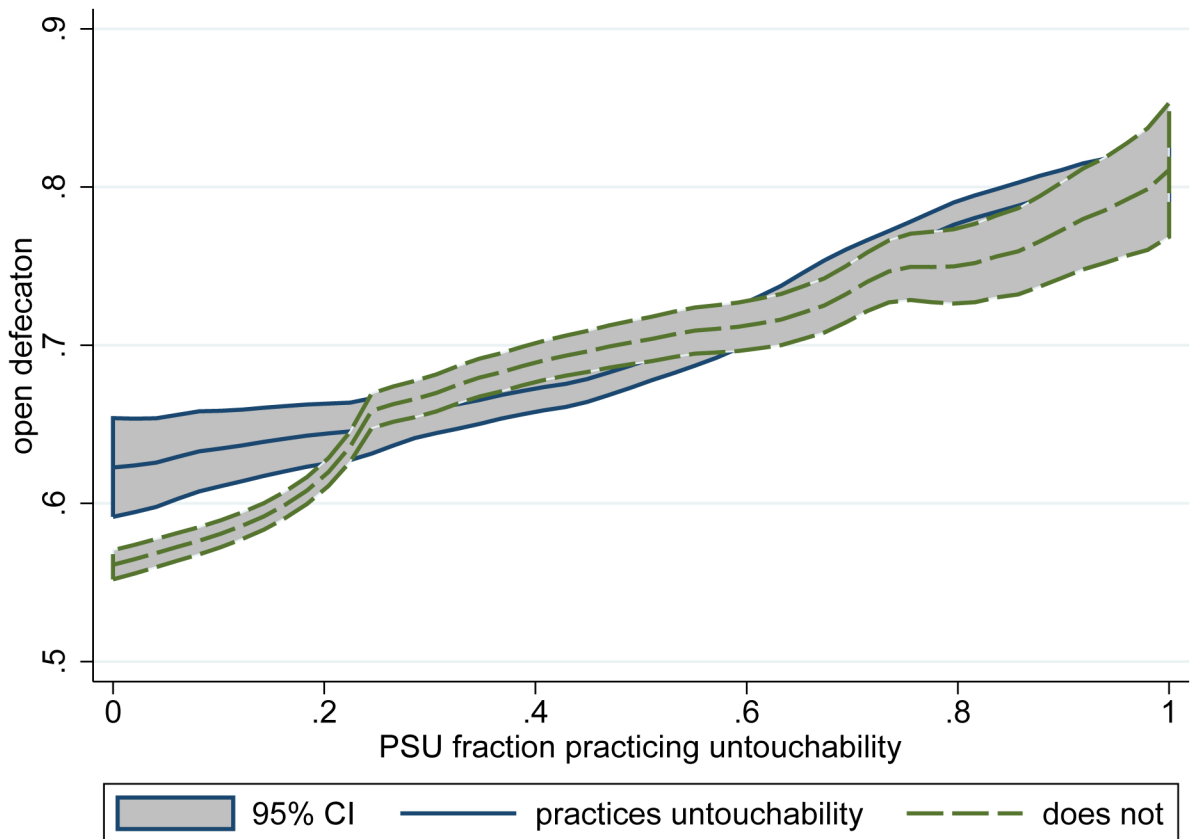

The sample, statistical specification, and definitions are identical to those used in figure 2 of the main text. The vertical axis and the legend refer to properties of the household.

**B. Supplementary Appendix**

for online publication only

Figure B2: Histogram of key independent variables: Village average practice of untouchability

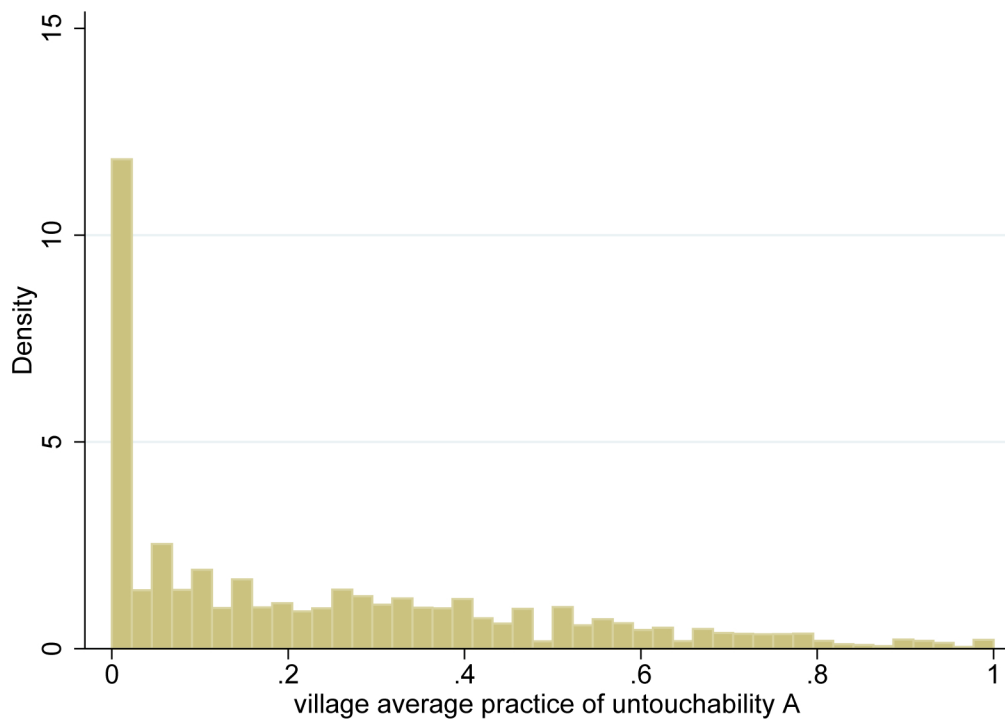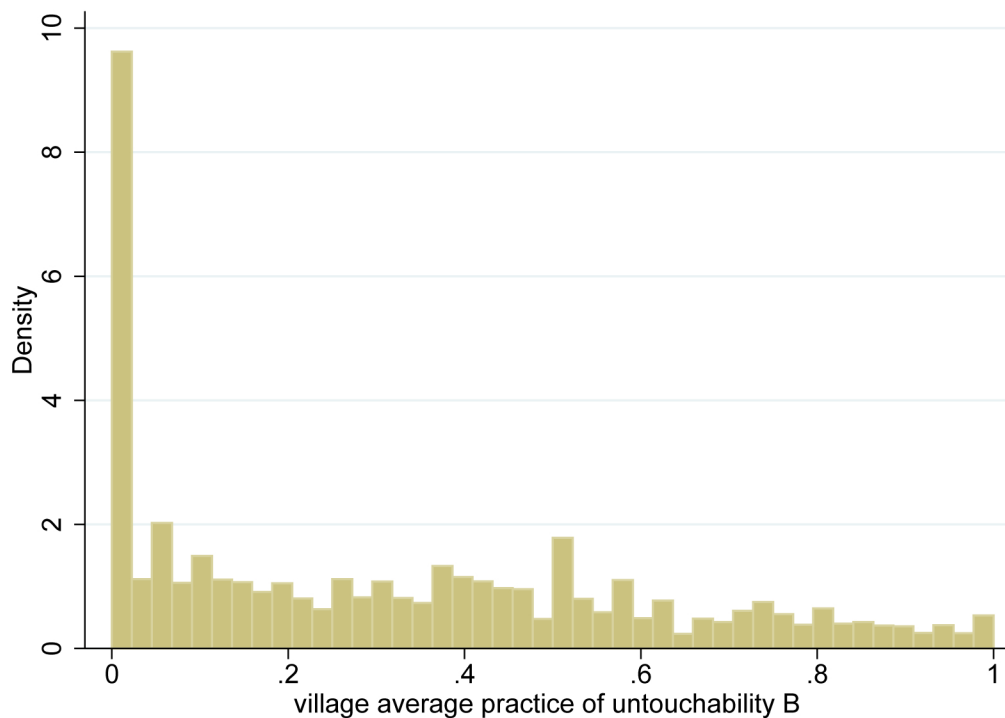

Supplement: NIHMS1913946-supplement-Supp_Material.pdf [file NIHMS1913946-supplement-Supp_Material.pdf]
